# Supplementary material for: China's transboundary hydropower development at home and abroad: exploring the regulatory interface between international water law and international economic law
Source: Frontiers journal article supplement (doi:10.3389/fclim.2023.1302103), 2024-01-23
Supplement: Data_Sheet_1.docx [file Data_Sheet_1.docx]

**Appendix 1: Chinese Hydropower Investment in Africa**

**Hydropower Projects in Africa Financed by Institutions**

| **No. C-I / P- 1** | **State** | **Borrower** | **Lender** | **Amount (million USD)** | **Project** | **Domestic or Transboundary*** | **River** | **International Investment Treaty w/ China (year)** | **Party to the Belt and Road Initiative?** |
| --- | --- | --- | --- | --- | --- | --- | --- | --- | --- |
| CI P1 |  |  | China Energy Engineering Corporation | 22 | Mabubas Hydropower Project Expansion 10MW | Domestic | Dande River |  |  |
| P2 |  |  | Eximbank | 112 | Hydropower in Chiumbe-dala 12.32MW | Transboundary | Chiumbe River (tributary of Congo) |  |  |
| P3 | Angola | Government | ICBC | 180 | Luachimo Hydropower Project; 36MW | Transboundary | Luachimo River (tributary of Congo) | No | Yes |
| P4 |  |  | 60 | Lomaum Hydropower Project (65 MW) | Domestic | Catumbela River |  |  |
| P5 |  |  | Multiple: | 4100 | Caculo Cabaca Hydropower Project 2170MW | Domestic | Kwanza River |  |  |
| P6 |  |  | ICBC; Eximbank; Bank of China; China Construction Bank; China Minsheng Bank; Ping An Bank; China Shanghai Pilot free Trade Zone |  |  |
| C II P7 | **Benin** | Government | Eximbank | 229 | Adjarala Hydropower Project 147MW | Transboundary | Mono River | 2004 (not inforce) | Yes |
| CIII P8 | **Cameroon** | Government | Eximbank | 52 | Mekin Hydropower Project 15MW | Transboundary | Dja River (border river) |  |  |
| P9 | 541 | Memve'ele Hydropower Project 211 MW | Transboundary | Ntem River (border river) |  |  |
| P10 | 142 | Memve'ele to Ebolowa Hydropower Transmission Lines #1; 225kV | Transboundary | Ntem River (border river) | 1997 (in force 2014) | Yes |
| P11 | 142 | Memve'ele to Ebolowa Hydropower Transmission Lines #2; 225kV | Transboundary | Ntem River (border river) |  |  |
| P12 | ICBC | 289 | Warak Hydropower Project on Bini River; Adamaoua 75MW | Transboundary | Bini River (Lake Chad Basin) |  |  |
| C IV P13 | **Central African Republic** | Government | MOFCOM | 18 | Boali No.3 Hydropower Project 10MW | Transboundary | Mbali River (tributary of Congo) | No |  |
| C V P14 | **Cote d’Ivoire** | Government | Eximbank | 500 | Soubre Hydropower Project 275MW | Transboundary | Sassandra River (Cote D’Ivoire, Guinea) | 2002 (not in force) | Yes |
| C VI P15 | **Democratic Republic of the Congo** | Government | Eximbank | 367 | Zongo II Hydropower Station 150MW | Transboundary | Inkisa River (tributary of Congo) |  | Yes |
| P16 | Sicohydro | 165 | Busanga Hydropower Project 240MW | Transboundary | Lualaba River (tributary of Congo) | 2011 (not in force) |  |
| C VII P17 | **Equatorial Guinea** | Government | Eximbank | 257 | Djibloho Hydropower Project 120MW | Domestic | Wele River | 2005 (in force 2006) | Yes |
| C 8 P18 | **Ethiopia** | Ethiopian Electric Power Corporation | Eximbank | 89 | Gibe III Hydropower Project 10x187(1870MW) - C (total 612mn) | Transboundary | Omo River (Turkana Basin) |  |  |
| P19 | Government | 116 | Finchaa-Amerti-Neshe (FAN) Hydropower Project; 97MW | Transboundary | Amerti/Neshi River (Nile) |  |  |
| P20 | Government | 270 | Genale-Dawa III Hydropower Project 3x84.7(254MW) | Transboundary | Jubba River (Ganale) | 1998 (in force 2000) | Yes |
| P21 | Government | 188 | Addis Ababa; 400km Transmission Lines and Substations; Gibe III Hydropower Project (total 612mn) | Transboundary | Omo River (Turkana Basin) |  |  |
| P22 | Ethiopian Electric Power Corporation | ICBC | 425 | Gibe III Hydropower Project 10x187(1870MW) | Transboundary | Omo River (Turkana Basin) |  |  |
| C IX P23 | **Gabon** | Government | Eximbank | 318 | Grand Poubara Hydropower Project 160MW; Phase I | Transboundary | Ogooué River | 1997 (in force 2009) | Yes |
| C X P24 | **Ghana** | Government | Eximbank | 306 | Bui Hydropower Project 400 MW | Transboundary | Black Volta River |  |  |
| P25 | 292 | Bui Hydropower Project 400 MW |  |  |
| P26 | 75 | Bui Hydropower Project 400MW Additional Finance Loan 1 | 1989 (in force 1990) | Yes |
| P27 | 76 | Bui Hydropower Project 400 MW Additional Finance Loan 2 |  |  |
| C XI P28 | **Guinea** | Government | China International Water & Electric Corporation (CWE) | 335 | Kaleta Hydropower Project 240MW | Domestic | Konkoure River |  |  |
| P29 | Chinese Government | 2 | Tinkisso Hydropower Project 11MW | Transboundary | Tinkisso River |  | Yes |
| P30 | 4 | Kinkon Hydropower Project 3.4MW | Domestic | Koulu River | 2005 (not in force) |  |
| P31 | Souapiti Hydropower SPV | Eximbank | 599 | Souapiti Hydropower Project 450MW | Domestic | Konkoure River |  |  |
| C XII P32 | **Madagascar** | Government | Eximbank | 197 | Ranomafana Hydropower Plant on Ikopa River 86MW | Domestic | Ikopa River | 2005, in force 2007 | Yes |
| C XIII P33 | **Mali** | Government | Eximbank | 248 | Gouina Hydropower Project 140MW | Transboundary | Senegal River | 2009, in force | Yes |
| C XIV P34 | **Republic of Congo** | Government | China Machinery Engineering Corporation | 238 | Imboulou Hydropower Station 20MW | Transboundary | Lefini River (tributary of Congo) |  |  |
| P35 | Eximbank | 264 | Transmission Lines from Imboulou Hydropower: 780km of 220kV; 91km of 110kV; 350km of 20kV&30kV | Transboundary | Lefini River (tributary of Congo) |  |  |
| P36 | 105 | Liouesso Hydropower Project 19.9MW | Transboundary | Sangha River (tributary of Congo) | 2000 (in force 2015) | Yes |
| P37 | 37 | 74km Transmission Line from Liouesso Hydropower Project to the town of Ouesso-North; 110kV | Transboundary | Sangha River (tributary of Congo) |  |  |
| C XV P38 | **Senegal** | Government | Eximbank | 146 | Gouina Hydropower 140MW Project; Senegal Portion | Transboundary | Senegal River | no | Yes |
| C XVI P39 | **Sierra Leone** | Government | Eximbank | 3 | Goma Hydropower Project Repairs in Dodo chiefdom Kenema District | Domestic | Sewa River | 2001 (not in force) | Yes |
| C XVII P40 | **Sudan** | Government | Chinese Government | 104 | Upper Atbara Hydropower Project - 135 MW | Transboundary | Atbarah River (Nile) |  |  |
| P 41 | Eximbank | 608 | Merowe Hydropower Project 1; 250MW | Transboundary | Nile | 1997, in force 1998 | Yes |
| P42 | 381 | Merowe Hydropower Project transmission lines and substations |  |  |
| C XVIII P43 | **Uganda** | Government | Eximbank | 1445 | Karuma Hydropower Project 600MW; 400kV Karuma-Kawanda & 400kV Karuma-Olwiyo & 80km Karuma-Lira Transmission Lines; 132kV; 6 Substations 400kV | Transboundary | Nile | 2004 (not inforce) | Yes |
| P44 | 483 | Isimba Hydropower Project 183MW | Transboundary | Nile |  |  |
| C XIX P45 | **Zambia** | Kariba North Bank Extension Power Corporation Limited | Eximbank | 316 | Kariba North Bank Extension Hydropower Project 360 MW | Transboundary | Zambezi River |  |  |
| P46 | Zambia Electricity Supply Corporation Limited |  | 183 | Lusiwasi Lower Hydropower Expansion Project / Lunzua Hydropower Rehabilitation Project 86MW | Transboundary | Kafue River (tributary of Zamebzi) / Lunzua River (drains into Lake Tanganyika) | 1996, in force 2014 | Yes |
| P47 | ICBC | 35 | Musonda Falls Hydropower Plant Rehabilitation and Upgrading; 10MW | Transboundary | Luongo River (tributary of Congo) |  |  |
| C XX P48 | **Zimbabwe** | Government | Eximbank | 160 | Kariba South Bank Hydropower Extension 300MW | Transboundary | Zambezi River | 1996, in force 1998 | Yes |

**Source:** Statistical information on China’s hydropower investment, excluding the transboundary status of each project, comes from: Brautigam, D., Hwang, J., Link, J., & Acker, K. (2020). Chinese Loans to Africa Database. Retrieved from [https://chinaafricaloandata.org/#](https://chinaafricaloandata.org/); Information on investment treaties between China and these African states comes from: UNCTAD (2023). Investment Policy Hub. International Investment Agreement Navigator. <https://investmentpolicy.unctad.org/international-investment-agreements/countries/42/china>

*****The authors have utilized a broad definition of “transboundary” to determine which projects may affect transboundary watercourses. For the purposes of this report, any hydropower project on a transboundary watercourse (mainstream or tributary, upstream or downstream, or river that forms the border) has been labelled as transboundary.
